# Supplementary material for: Climate factors determine the utilization strategy of forest plant resources at large scales
Source: Frontiers journal article supplement (doi:10.3389/fpls.2022.990441), 2022-08-10
Supplement: Presentation_1.pdf [file Presentation_1.pdf]

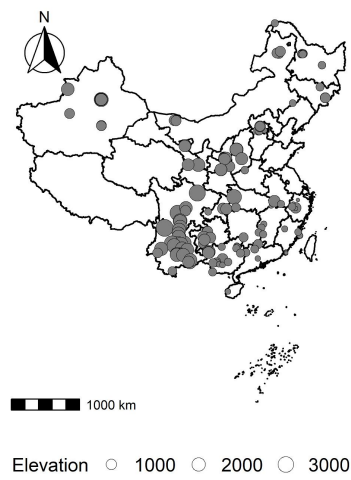

**FIGURE S1** | The geographical location of forest plots in this study.
